# Supplementary material
Source: PubMed Central journal article supplement (PMC3815531)
Supplement: NIHMS431771-supplement-01.pdf [file NIHMS431771-supplement-01.pdf]

## Supplementary Tables

**Table 1: Targeted sequencing coverage by population**

| Population                             | Total Genomes Studied | Average coverage | Average Coverage (Microsat Loci) |
|----------------------------------------|-----------------------|------------------|----------------------------------|
| Central European in Utah, USA (CEU)    | 57                    | 64.5x            | 15.7x                            |
| Han Chinese in Beijing, China (CHB)    | 95                    | 32.6x            | 13.3x                            |
| Tuscan in Florence, Italy (TSI)        | 4                     | 73.4x            | 35.5x                            |
| Chinese in Denver, Colorado, USA (CHD) | 107                   | 29.7x            | 15.3x                            |
| Luhya in Webuye, Kenya (LWK)           | 108                   | 21.4x            | 12.4x                            |
| Yoruba in Ibadan, Nigeria (YRI)        | 84                    | 57.0x            | 14.8x                            |
| Japanese in Tokyo, Japan (JPT)         | 96                    | 59.8x            | 20.8x                            |
| All                                    | 551                   | 45.5x            | 15.5x                            |

The individuals studied were those which were sequenced on the Illumina or 454 platforms at a minimum read length (reads of at least 45 base pairs in length). Coverage in microsatellite regions only considers those reads which completely span the microsatellite loci in targeted regions and were specifically aligned to a particular microsatellite locus through enough unique flanking sequence on both sides of the repeat.

**Table 2: Variations at microsatellite loci by population**

(A)

| Region     | CEU<br>Genomes: 57   |        | CHB<br>Genomes: 95   |        | TSI<br>Genomes: 4    |        | CHD<br>Genomes: 107  |        |
|------------|----------------------|--------|----------------------|--------|----------------------|--------|----------------------|--------|
|            | Reliable<br>Genotype | % Diff |
| Upstream   | 124                  | 4.8%   | 136                  | 7.4%   | 124                  | 4.8%   | 136                  | 7.4%   |
| 5'UTR      | 230                  | 5.7%   | 235                  | 8.1%   | 230                  | 5.7%   | 235                  | 8.1%   |
| Exon       | 1,273                | 4.8%   | 1,274                | 6.8%   | 1,273                | 4.8%   | 1,274                | 6.8%   |
| Intron     | 5,317                | 6.3%   | 5,573                | 9.0%   | 5,317                | 6.3%   | 5,573                | 9.0%   |
| 3'UTR      | 350                  | 4.6%   | 359                  | 8.9%   | 350                  | 4.6%   | 359                  | 8.9%   |
| Downstream | 112                  | 5.4%   | 112                  | 8.9%   | 112                  | 5.4%   | 112                  | 8.9%   |
| Total      | 7,406                | 5.9%   | 7,689                | 8.6%   | 7,406                | 5.9%   | 7,689                | 8.6%   |

(B)

| Region     | LWK<br>Genomes: 108  |        | YRI<br>Genomes: 84   |        | JPT<br>Genomes: 96   |        |
|------------|----------------------|--------|----------------------|--------|----------------------|--------|
|            | Reliable<br>Genotype | % Diff | Reliable<br>Genotype | % Diff | Reliable<br>Genotype | % Diff |
| Upstream   | 130                  | 15.4%  | 129                  | 6.2%   | 134                  | 4.5%   |
| 5'UTR      | 230                  | 16.5%  | 231                  | 5.2%   | 246                  | 4.5%   |
| Exon       | 1,256                | 10.6%  | 1,278                | 6.7%   | 1,287                | 4.4%   |
| Intron     | 5,602                | 15.6%  | 5,498                | 7.4%   | 5,510                | 5.7%   |
| 3'UTR      | 363                  | 13.8%  | 360                  | 8.6%   | 345                  | 4.6%   |
| Downstream | 111                  | 14.4%  | 112                  | 6.3%   | 117                  | 6.0%   |
| Total      | 7,692                | 14.7%  | 7,608                | 7.2%   | 7,639                | 5.4%   |

The total number of reliable genotypes which could be called in at least one sample for a specific microsatellite loci are shown along with the percent of those microsatellite loci which differed from the human reference sequence in at least one individual in the population. All reads were processed as though they were from the 454 platform and so homopolymer regions were removed for all to provide consistency.

**Table 3: Average variation at microsatellite loci per individual by population**

| Region                 | CEU             | CHB             | TSI | CHD             | LWK             | YRI             | JPT             | ALL             |
|------------------------|-----------------|-----------------|-----|-----------------|-----------------|-----------------|-----------------|-----------------|
| Total Genomes Analyzed | 54              | 94              | 1   | 107             | 108             | 67              | 96              | 530             |
| Upstream               | 1.8%<br>(±0.3%) | 0.6%<br>(±0.1%) | -   | 0.5%<br>(±0.1%) | 1.8%<br>(±0.0%) | 2.0%<br>(±0.3%) | 0.6%<br>(±0.1%) | 1.1%<br>(±0.0%) |
| 5'UTR                  | 1.4%<br>(±0.0%) | 1.6%<br>(±0.2%) | -   | 1.2%<br>(±0.1%) | 1.2%<br>(±0.0%) | 0.6%<br>(±0.1%) | 1.1%<br>(±0.1%) | 1.2%<br>(±0.1%) |
| Exon                   | 0.5%<br>(±0.0%) | 0.5%<br>(±0.0%) | -   | 0.5%<br>(±0.0%) | 0.7%<br>(±0.0%) | 0.6%<br>(±0.1%) | 0.4%<br>(±0.0%) | 0.5%<br>(±0.0%) |
| Intron                 | 1.2%<br>(±0.0%) | 1.1%<br>(±0.0%) | -   | 1.2%<br>(±0.0%) | 1.6%<br>(±0.0%) | 1.2%<br>(±0.0%) | 1.0%<br>(±0.1%) | 1.2%<br>(±0.0%) |
| 3'UTR                  | 0.8%<br>(±0.1%) | 0.9%<br>(±0.0%) | -   | 0.9%<br>(±0.0%) | 1.0%<br>(±0.0%) | 1.0%<br>(±0.1%) | 0.8%<br>(±0.0%) | 0.9%<br>(±0.0%) |
| Downstream             | 0.6%<br>(±0.1%) | 0.8%<br>(±0.1%) | -   | 1.7%<br>(±0.0%) | 0.8%<br>(±0.1%) | 0.4%<br>(±0.0%) | 1.0%<br>(±0.1%) | 0.9%<br>(±0.1%) |
| Total                  | 1.1%<br>(±0.1%) | 0.9%<br>(±0.0%) | -   | 1.0%<br>(±0.0%) | 1.2%<br>(±0.1%) | 1.0%<br>(±0.0%) | 0.8%<br>(±0.0%) | 1.0%<br>(±0.0%) |

The total variations at microsatellite loci on average for a single individual in the population are presented. Only those samples which had at least 10% of the total microsatellite allelotypes found (300) were considered. The TSI population is not shown as there were less than two individuals remaining with at least 300 microsatellite allelotypes after processing out all homopolymer regions which are error prone for the 454 platform to obtain consistency between the Illumina and 454 results. The number in parenthesis is the standard deviation.

**Table 4: Primers for Sanger sequencing validation**

| Samples | Gene   | Forward Primer        | Reverse Primer        | Variation |
|---------|--------|-----------------------|-----------------------|-----------|
| NA06994 | TARS2  | AGGGAGGGATGGTGATAAGG  | AGCTTCTTCTAGTCCCTCAGC | T/A       |
| NA06994 | WNK3   | CAATATCCTCTGGCGCATC   | TCCATTTGCAGTGCCTCTTC  | T/C       |
| NA07048 | HEATR6 | GAGATCGCCTCAAATCAAGG  | AGCTTGGAGAGGTGATTTGC  | T/C       |
| NA11918 | BAIAP3 | CATGCTAAGTAGGGCATCTGG | GTGACCTGGATGCACTTGG   | C/T       |
| NA12249 | NPC1L1 | TGTGGCACATGGAGTAGAGG  | GATCACTCGAGGTGTTGTGG  | G/T       |
| NA12249 | PLXDC1 | CTCATGTTGGCTGACTGTGG  | AACACAGCGAGACCTCATCC  | G/T       |
| NA12272 | GIGYF2 | AGCATAACCAGGCCTTTGTGG | CCTCTGGCGCATTAACTCC   | G/T       |
| NA12414 | GPR114 | AGAACTGGGTGTGCTTCTCC  | GCGAGGAGAGATGATGTGC   | C/A       |
| NA12717 | COL6A3 | CCAGGTGTACAAGCCCAGAT  | AAGCCAGCAGCTGTAAGACC  | -/GCT     |
| NA12750 | TBX18  | CATGGATAAGCTGGTCTGTGG | CTCCAAGGTACTGGGAATGG  | T/G       |
| NA12873 | RCL1   | GGTGCTGTTGGTCTTGAAGG  | AACCTCGGGAAGAAGTAAAGC | G/A       |
| NA18539 | UTRN   | TGCTACCCTCAGTGGAAAGG  | TGAGGGTGTGTTTCACTTGC  | A/G       |
| NA18596 | FBXO24 | CCAAGCTCCAACCTCATCTCC | AATACAGGTGGGCTCTCAGC  | G/A       |
| NA18641 | TEX14  | AGGCACAGAGCTGAATAGCC  | GCAGGTTCTGTGTGGAGACC  | G/A       |
| NA18985 | FTSJ3  | GGGAACTCCAAGCTCTACCC  | AGAACAAGCAAAGGCACTGG  | C/A       |
| NA19011 | OR10H3 | TGTTCACTGTTGCCATCACC  | ACACACACCAGCATCACACC  | C/A       |
| NA19011 | TIAM2  | GAAGAATTCCTCCAGCAACG  | CGGAAATCCTCAGTCTCTGG  | G/A       |
| NA19220 | CDHR2  | CCAATGGCTCCATAGTCCTC  | GAGCACTGGATGGTGAAGGT  | -/CAA     |
| NA19462 | ETS2   | GCTTCGAGAGCTCAGACTCC  | CGGTGAATGTGGTACTGTGG  | C/A       |
| NA19556 | ZSCAN2 | CAGACATCCCGAGAGTGACC  | TGACCCTGCTCATGGTACG   | G/C       |
| NA20763 | CLSPN  | TGCAGTGCTTTGGCTGTAAC  | ACAATCCAGGCCATGCTAAC  | -/GAA     |
| NA20763 | KANK1  | TCCGAGTCAGATGACGAGTG  | AGGGAAGGGGAATGTACCAC  | -/GGA     |

The non-synonymous variations which could not be validated in HapMap were validated by Sanger capillary sequencing using the primers shown.
